# Supplementary material for: Ozone deposition measurements over wheat fields in the North China Plain: variability and related factors of deposition flux and velocity
Source: Copernicus journal article supplement (doi:10.5194/egusphere-2024-643), 2024-03-27
Supplement: Supplementary file 1 [file egusphere-2024-643-supplement.pdf]

# Supplemental Material

## **Ozone deposition measurements over wheat fields in the North China Plain: variability and related factors of deposition flux and velocity**

5 Xiaoyi Zhang<sup>1,2</sup>, Wanyun Xu<sup>1,\*</sup>, Weili Lin<sup>3</sup>, Gen Zhang<sup>1</sup>, Jinjian Geng<sup>4,5</sup>, Li Zhou<sup>4,5</sup>, Huarong Zhao<sup>4,5</sup>, Sanxue Ren<sup>4,5</sup>, Guangsheng Zhou<sup>4,5</sup>, Jianmin Chen<sup>2</sup> and Xiaobin Xu<sup>1,\*</sup>

<sup>1</sup> State Key Laboratory of Severe Weather, Key Laboratory for Atmospheric Chemistry, Institute of Atmospheric Composition, Chinese Academy of Meteorological Sciences, Beijing, China, 100081

<sup>2</sup> Department of Atmospheric and Oceanic Sciences, Fudan University, Shanghai, China, 200433

10 <sup>3</sup> College of Life and Environmental Sciences, Minzu University of China, Beijing, China, 100081

<sup>4</sup> State Key Laboratory of Severe Weather, Institute of Agricultural Meteorology, Chinese Academy of Meteorological Sciences, Beijing, China, 100081

<sup>5</sup> Hebei Gucheng Agricultural Meteorology National Observation and Research Station, Baoding, China, 072656

*Correspondence to:* Wanyun Xu (xuwy@cma.gov.cn) and Xiaobin Xu ([xiaobin\\_xu@189.cn](mailto:xiaobin_xu@189.cn))

## 15 List of Contents:

**Figure S1:** The influences of wind dead-bands ( $w_0$ ) on REA-H<sub>2</sub>O (a, d), REA-CO<sub>2</sub> (b, e) and REA-heat (c, f) fluxes in the daytime (a-c) and nighttime (d-f), driven by EC raw data with a constant  $b = 0.60$ .  $F^*$  and  $F$  represent the REA fluxes with and without  $w_0$ , respectively. The linear regressions and correlation coefficients ( $r$ ) between  $F^*$  and  $F$  are inset in each figure, and  $n$  is the total number of the valid fluxes.

20 **Figure S2:** The comparison of O<sub>3</sub> concentration in the updraft and downdraft reservoirs.

**Figure S3:** The comparison of CO<sub>2</sub> (a), H<sub>2</sub>O (b) and heat (c) fluxes driven by EC theory and REA technique with a constant  $b = 0.60$  and  $w_0$ . The linear regressions and correlation coefficients ( $r$ ) between two fluxes are inset in each figure.

**Figure S4:** Variations of O<sub>3</sub> flux (purple lines) and concentration (orange lines) during (a) 8-13 April, (b) 27 April-1 May and (c) 18-22 May, with shades representing daytime hours.

25 **Figure S5:** Variations of nighttime averaged O<sub>3</sub> deposition velocity ( $V_d$ , blue circle lines), H<sub>2</sub>O flux ( $F_{H_2O}$ , green lines) and NO concentration (red lines) during 18 March-2 June.

**Table S1:** Summary of observed O<sub>3</sub> deposition velocity ( $V_d$ ) in recent years.

**Table S2:** Winter wheat phenology at GC during 2022-2023.

30 **Table S3:** The relationships of O<sub>3</sub> deposition velocity ( $V_d$ ) and friction velocity ( $u^*$ ), soil volumetric water content (soil VWC) at different ranges of LAI.

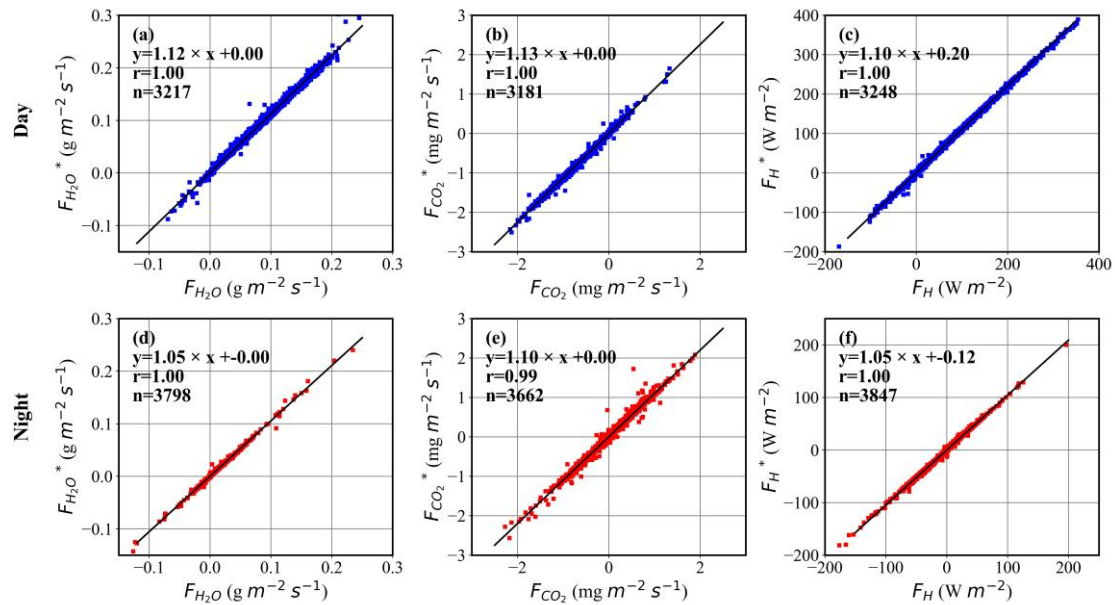

35 **Figure S1: The influences of wind dead-bands ( $w_0$ ) on REA- $H_2O$  (a, d), REA- $CO_2$  (b, e) and REA-heat (c, f) fluxes in the daytime (a-c) and nighttime (d-f), driven by EC raw data with a constant  $b = 0.60$ .  $F^*$  and  $F$  represent the REA fluxes with and without  $w_0$ , respectively. The linear regressions and correlation coefficients ( $r$ ) between  $F^*$  and  $F$  are inset in each figure, and  $n$  is the total number of the valid fluxes.**

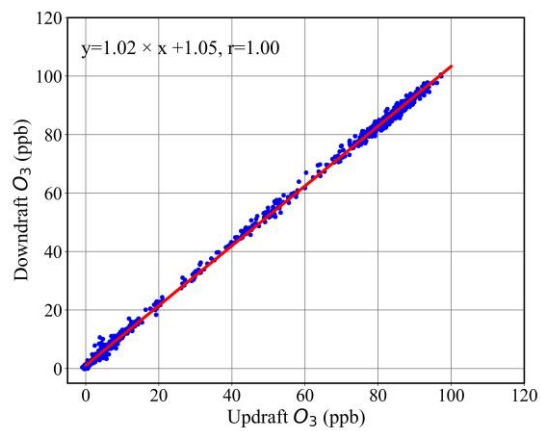

**Figure S2: The comparison of O<sub>3</sub> concentration in the updraft and downdraft reservoirs.**

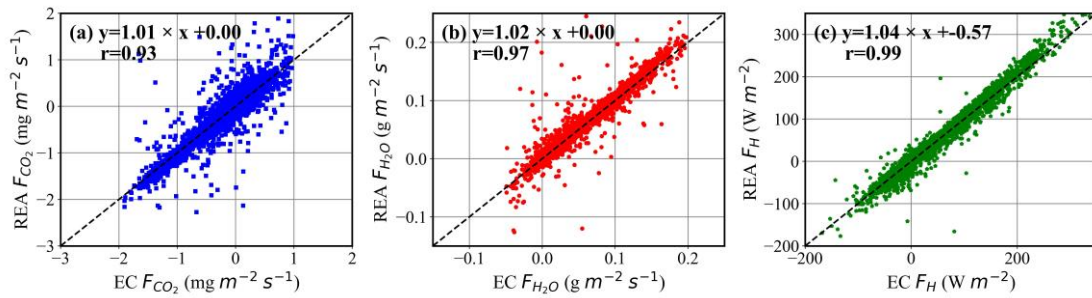

45 **Figure S3: The comparison of CO<sub>2</sub> (a), H<sub>2</sub>O (b) and heat (c) fluxes driven by EC theory and REA technique with a constant  $b = 0.60$  and  $w_0$ . The linear regressions and correlation coefficients ( $r$ ) between two fluxes are inset in each figure.**

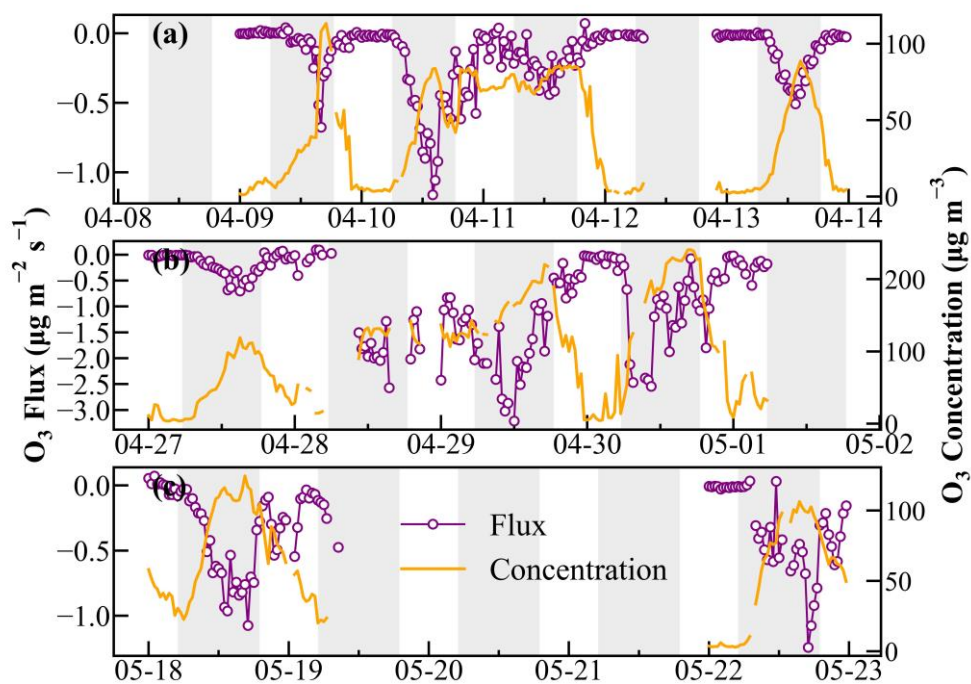

50 **Figure S4: Variations of O<sub>3</sub> flux (purple lines) and concentration (orange lines) during (a) 8-13 April, (b) 27 April-1 May and (c) 18-22 May, with shades representing daytime hours.**

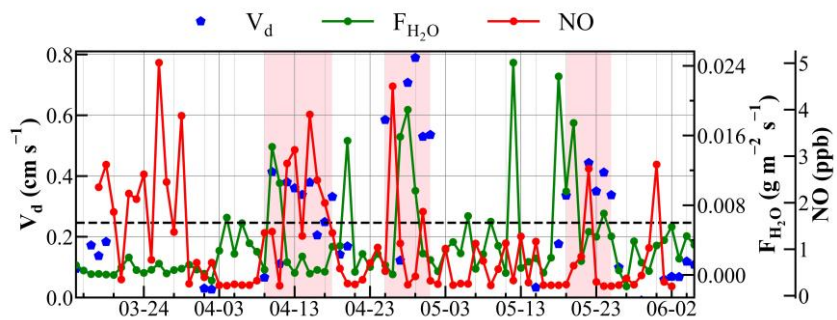

55 **Figure S5: Variations of nighttime averaged O<sub>3</sub> deposition velocity ( $V_d$ , blue circle lines), H<sub>2</sub>O flux ( $F_{H_2O}$ , green lines) and NO concentration (red lines) during 18 March-2 June.**

**Table S1: Summary of observed O<sub>3</sub> deposition velocity (V<sub>d</sub>) in recent years.**

| Surface type | Date                   | Metrics            | V <sub>d</sub><br>(cm s <sup>-1</sup> ) | Site                       | Method          | References              |
|--------------|------------------------|--------------------|-----------------------------------------|----------------------------|-----------------|-------------------------|
| Wheat        | 2016.3.16-5.30         | Mean               | 0.39                                    | Nanjing, China             | EC              | (Xu et al., 2018)       |
|              | 2012.3.7-6.7           | Day Mean           | 0.42                                    | Yucheng, China             | EC              | (Zhu et al., 2015)      |
|              |                        | Night Mean         | 0.14                                    |                            |                 |                         |
| Maize        | 2011.8.9-9.28          | Day mean           | 0.29                                    | Yucheng, China             | EC              | (Zhu et al., 2014)      |
|              | 2002 summer            | Night mean         | 0.09                                    | Grignon, France            | EC              | (Lamaud et al., 2009)   |
|              |                        | Mean               | 0.5                                     |                            |                 |                         |
| Potato       | 2006 summer            | Mean               | 0.66                                    | Scotland, England          | EC              | (Coyle et al., 2009)    |
| Grassland    | May 2000               | Mean               | 0.22±0.22                               | Braunschweig, Germany      | EC              | (Mészáros et al., 2009) |
|              | May 2001- Nov. 2004    | Median             | 0.48±0.37                               | Scotland, England          | FG/EC           | (Coyle, 2005)           |
| Moorland     | 1995-1998              | Mean, at 0-40 ppb  | 0.75                                    | Auchencorth Moss, Scotland | FG/EC           | (Fowler et al., 2001)   |
|              | 1995-1998              | Mean, at 40-80 ppb | 0.4                                     |                            |                 |                         |
| Forest       | 2000-2009              | Range              | 0.11-0.42                               | Hyttiälä, Finland          | EC              | (Rannik et al., 2012)   |
|              | 1993-2000              | Median             | 0.30                                    | Massachusetts, America     | EC              | (Wu et al., 2015)       |
|              |                        |                    | 0.35                                    |                            | FG <sup>c</sup> |                         |
|              |                        |                    | 0.35                                    |                            | FG <sup>d</sup> |                         |
|              |                        |                    | 0.62                                    |                            | FG <sup>e</sup> |                         |
| Soil         | 2001.4.30-5.31         | Mean               | 0.21±0.21                               | La Crau, France            | EC              | (Stella et al., 2019)   |
|              | 2008-2010 <sup>a</sup> |                    | 0.29±0.33                               | Lamasquere, France         |                 |                         |
|              | 2007.10.19-2008.3.4    |                    | 0.26±0.20                               | La Cape Sud, France        |                 |                         |
|              | 2011.3.17-5.5          |                    | 0.36±0.28                               | Lusignan, France           |                 |                         |
|              | 2014.3.24-4.14         |                    | 0.61±0.48                               | Turro, Italy               |                 |                         |
| Sea          | 2006-2008              | Range              | 0.01-0.24                               | Gulf of Mexico             | EC              | (Bariteau et al., 2010) |
|              | 2006-2008              | Range              | 0.009-                                  | - <sup>b</sup>             | EC              | (Helmig et al.,         |



---

EC represents eddy covariance (EC) method, and FG refers flux-gradient (FG) approach.

60 <sup>a</sup> The specific observation periods includes 2008.4.24-5.26, 2008.11.20-12.18, 2009.11.14-2010.5.12 and 2010.9.29-11.9.

<sup>b</sup> The seas includes The Gulf of Mexico, Eastern Pacific Ocean, Western Atlantic Ocean and Southern Ocean.

<sup>c</sup> Modified micrometeorological gradient method.

<sup>d</sup> Modified Bowen ratio gradient method.

<sup>e</sup> Aerodynamic gradient method.

65

**Table S2: Winter wheat phenology at GC during 2022-2023.**

|              |            |            |            |            |            |            |            |
|--------------|------------|------------|------------|------------|------------|------------|------------|
| <b>Stage</b> | Sowing     | Emergence  | Three-leaf | Tillering  | Dormancy   | Greening   | Standing   |
| <b>Date</b>  | 2022.10.18 | 2022.10.28 | 2022.11.19 |            | 2022.11.29 | 2023.03.02 | 2023.03.21 |
| <b>Stage</b> | Elongation | Booting    | Heading    | Flowering  | Milk-ripe  | Ripening   | Harvest    |
| <b>Date</b>  | 2023.04.01 | 2023.04.15 | 2023.04.27 | 2023.05.05 | 2023.05.25 | 2023.06.11 | 2023.06.18 |

70 **Table S3: The relationships of O<sub>3</sub> deposition velocity (V<sub>d</sub>) and friction velocity (u\*), soil volumetric water content (soil VWC) at different ranges of LAI.**

|                           |         | Slope | Intercept | Std. Err. | p-value | r    | n   |
|---------------------------|---------|-------|-----------|-----------|---------|------|-----|
| V <sub>d</sub> ~ u*       | LAI<1   | 0.84  | 0.09      | 0.32      | 0.00    | 0.39 | 158 |
|                           | 1≤LAI<2 | 1.13  | 0.04      | 0.67      | 0.00    | 0.45 | 48  |
|                           | 2≤LAI<3 | 2.36  | 0.01      | 0.40      | 0.00    | 0.57 | 282 |
|                           | LAI≥3   | 1.91  | 0.15      | 0.49      | 0.00    | 0.42 | 285 |
| V <sub>d</sub> ~ soil VWC | LAI>3.0 | 4.42  | -1.23     | 1.01      | 0.00    | 0.46 | 285 |
|                           | LAI>3.5 | 7.25  | -2.30     | 2.02      | 0.00    | 0.46 | 186 |
|                           | LAI>4.0 | 8.44  | -2.86     | 2.40      | 0.00    | 0.52 | 132 |
|                           | LAI>4.5 | 15.32 | -5.86     | 5.61      | 0.00    | 0.67 | 39  |

## References

- 75 Bariteau, L., Helmig, D., Fairall, C. W., Hare, J. E., Hueber, J., and Lang, E. K.: Determination of oceanic ozone deposition by ship-borne eddy covariance flux measurements, *Atmos. Meas. Tech.*, 3, 441-455, 10.5194/amt-3-441-2010, 2010.  
Coyle, M.: The gaseous exchange of ozone at terrestrial surfaces : non-stomatal deposition to grassland, Coyle, M., Nemitz, E., Storeton-West, R., Fowler, D., and Cape, J. N.: Measurements of ozone deposition to a potato canopy, *Agricultural and Forest Meteorology*, 149, 655-666, <https://doi.org/10.1016/j.agrformet.2008.10.020>, 2009.
- 80 Fowler, D., Flechard, C., Cape, J. N., Storeton-West, R. L., and Coyle, M.: Measurements of Ozone Deposition to Vegetation Quantifying the Flux, the Stomatal and Non-Stomatal Components, *Water, Air, and Soil Pollution*, 130, 63-74, 10.1023/A:1012243317471, 2001.  
Helmig, D., Lang, E. K., Bariteau, L., Boylan, P., Fairall, C. W., Ganzeveld, L., Hare, J. E., Hueber, J., and Pallandt, M.: Atmosphere-ocean ozone fluxes during the TexAQS 2006, STRATUS 2006, GOMECC 2007, GasEx 2008, and AMMA 2008 cruises, *J. Geophys. Res. Atmos.*, 117, <https://doi.org/10.1029/2011JD015955>, 2012.
- 85 Lamaud, E., Loubet, B., Irvine, M., Stella, P., Personne, E., and Cellier, P.: Partitioning of ozone deposition over a developed maize crop between stomatal and non-stomatal uptakes, using eddy-covariance flux measurements and modelling, *Agricultural and Forest Meteorology*, 149, 1385-1396, <https://doi.org/10.1016/j.agrformet.2009.03.017>, 2009.  
Mészáros, R., Horváth, L., Weidinger, T., Neftel, A., Nemitz, E., Dämmgen, U., Cellier, P., and Loubet, B.: Measurement and modelling ozone fluxes over a cut and fertilized grassland, *Biogeosciences*, 6, 1987-1999, 10.5194/bg-6-1987-2009, 2009.
- 90 Rannik, Ü., Altimir, N., Mammarella, I., Bäck, J., Rinne, J., Ruuskanen, T. M., Hari, P., Vesala, T., and Kulmala, M.: Ozone deposition into a boreal forest over a decade of observations: evaluating deposition partitioning and driving variables, *Atmos. Chem. Phys.*, 12, 12165-12182, 10.5194/acp-12-12165-2012, 2012.  
Stella, P., Loubet, B., de Berranger, C., Charrier, X., Ceschia, E., Gerosa, G., Finco, A., Lamaud, E., Serça, D., George, C., and Ciuraru, R.: Soil ozone deposition: Dependence of soil resistance to soil texture, *Atmos. Environ.*, 199, 202-209, 10.1016/j.atmosenv.2018.11.036, 2019.
- 95 Wu, Z. Y., Zhang, L., Wang, X. M., and Munger, J. W.: A modified micrometeorological gradient method for estimating  $O_3$  dry depositions over a forest canopy, *Atmos. Chem. Phys.*, 15, 7487-7496, 10.5194/acp-15-7487-2015, 2015.  
Xu, J., Zheng, Y., Mai, B., Zhao, H., Chu, Z., Huang, J., and Yuan, Y.: Simulating and partitioning ozone flux in winter wheat field: the Surf atm-O<sub>3</sub> model (in Chinese), *China Environmental Science* 38, 455-470, 2018.
- 100 Zhu, Z., Sun, X., Zhao, F., and Meixner, F. X.: Ozone concentrations, flux and potential effect on yield during wheat growth in the Northwest-Shandong Plain of China, *Journal of Environmental Sciences*, 34, 1-9, <https://doi.org/10.1016/j.jes.2014.12.022>, 2015.  
Zhu, Z., Sun, X., Dong, Y., Zhao, F., and Meixner, F. X.: Diurnal variation of ozone flux over corn field in Northwestern Shandong Plain of China, *Science China Earth Sciences*, 57, 503-511, 10.1007/s11430-013-4797-9, 2014.
